# Supplementary material for: An antibacterial γ-CD-MOF complex functionalized film for fish meat safety and freshness
Source: Royal Society of Chemistry journal article supplement (doi:10.1039/d5fb00743g), 2025-12-04
Supplement: d5fb00743g1.pdf [file d5fb00743g1.pdf]

**1 Antibacterial  $\gamma$ -CD-MOF Complex Functionalized Film for Fish Meat Safety and**  
**2 Freshness**

3

4 Meimei Guo<sup>a</sup>, Tahirou Sogore<sup>a</sup>, Jin Huang<sup>a</sup>, Xinyu liao<sup>c</sup>, Mofei Shen<sup>b\*</sup>, Tian Ding<sup>a,c\*</sup>

5

6 *<sup>a</sup>College of Biosystems Engineering and Food Science, Zhejiang University,*  
7 *Hangzhou, 310058, China.*

8 *<sup>b</sup>Department of Food Science and Engineering, Zhejiang University of Technology,*  
9 *Hangzhou, Zhejiang 310014, People's Republic of China.*

10 *<sup>c</sup>Innovation Center of Yangtze River Delta, Zhejiang University, Jiaxing, 314102,*  
11 *China.*

12

13 *\*Correspondence to: mfshen@zjut.edu.cn, tding@zju.edu.cn.*

14

15

**16 Synthesis of  $\gamma$ -CD-MOF and its complex**

17  $\gamma$ -CD (2962 mg) and KOH (1024 mg) were dissolved in 80 mL ultra-pure water, stirred  
18 thoroughly at room temperature, and filtered through a 0.45  $\mu$ m membrane. The filtrate was mixed  
19 with 48 mL MeOH in a conical flask to form a white solution, which was then stirred in a 90°C  
20 water bath (400 rpm) for 5 minutes. After adding polyethylene glycol 8000 (1024 mg) and stirring  
21 for another 5 minutes, the flask was transferred to a cold-water bath and left overnight to  
22 precipitate. The white precipitate was centrifuged (5000 rpm, 5 minutes), washed thrice with  
23 MeOH, dispersed in MeOH, and vacuum-dried at 60°C for 5 hours to yield  $\gamma$ -CD-MOF. For the  $\gamma$ -  
24 CD-MOF complex, 46.5 mg  $\gamma$ -CD-MOF was immersed in 5 mL acetonitrile containing 1.25 mM  
25 chloroauric acid. The suspension was gently shaken (60 rpm) and incubated at 37°C in the dark  
26 for 21 hours. The resulting  $\gamma$ -CD-MOF complex was collected by centrifugation (5000 rpm, 5  
27 minutes), washed repeatedly with acetonitrile, and vacuum-dried at 60°C for 5 hours.

28

**29 Synthesis of functionalized film**

30 8 g Polydimethylsiloxane SYLGARD elastomer and 0.8 g curing agent were dissolved in 40

31 mL n-hexane, stirred at 1000 rpm for 30 minutes, cast onto a polytetrafluoroethylene substrate,  
32 evaporated at room temperature for 5 hours, and thermally treated at 80°C for 15 minutes.  
33 Meanwhile, 150 mg  $\gamma$ -CD-MOF complex was dispersed in 20 mL n-hexane, poured onto the pre-  
34 cured membrane, and after n-hexane evaporation (5 minutes), cured at 70°C for 5 hours. A pure  
35 film was fabricated identically without  $\gamma$ -CD-MOF complex.

36

#### 37 Cytotoxicity assay of $\gamma$ -CD-MOF complex

38 Caco-2 cells were cultured in DMEM (10% fetal bovine serum).  $\gamma$ -CD-MOF complex was  
39 dissolved in DMEM at 1000, 500, 250, 125, 62.5  $\mu\text{g/mL}$ . 10  $\mu\text{L}$  of each solution was added to  
40 wells, incubated at 37°C for 48 hours, then 10  $\mu\text{L}$  1 $\times$  CCK8 was added and incubated 2 hours  
41 more. OD<sub>450</sub> was measured via microplate reader; cell viability (A%) was calculated as follows:

$$42 \quad A(\%) = (A_s/A_c) \times 100\%$$

43  $A_s$  and  $A_c$  represent the absorbance of the experimental group and the control group,  
44 respectively. Each sample was triplicated.

45

#### 46 Gold ions loading rate

47 The loading capacity of gold ions in the  $\gamma$ -CD-MOF complex was quantified via the  
48 following protocol: initially, 10 mg of  $\gamma$ -CD-MOF complex was dispersed in 1 mL of deionized  
49 water to form a homogeneous suspension. The resulting suspension was subjected to acid  
50 digestion, followed by a 1000-fold dilution with 1.5 M hydrochloric acid. The gold ions  
51 concentration in the diluted solution was determined using an inductively coupled plasma mass  
52 spectrometer (ICP-MS, Nexions 300XX, PerkinElmer, USA). The loading capacity of gold ions  
53 was computed based on the following formula:

$$54 \quad L(\%) = C_{Au} / (C - C_{Au}) \times 100\%$$

55 where L was the percentage loading rate (%),  $C_{Au}$  was the content (mg) of gold ions, and C  
56 was the content (mg) of total  $\gamma$ -CD-MOF complex.

57

#### 58 Water vapor transmission rate analysis

59 The water vapor transmission rate (WVTR) of pure film and functionalized film was  
60 determined via the gravimetric method using a water vapor transmission rate analyzer.

Specifically, the films were cut into circular discs with a diameter of 74 mm, and the tests were conducted under controlled conditions of 38°C and 90% relative humidity.

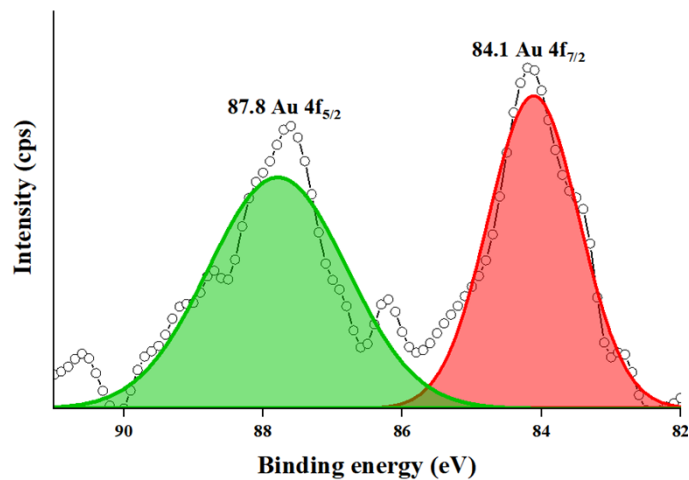

Fig. S1. High-resolution Au 4f XPS spectra obtained from  $\gamma$ -CD-MOF complex.

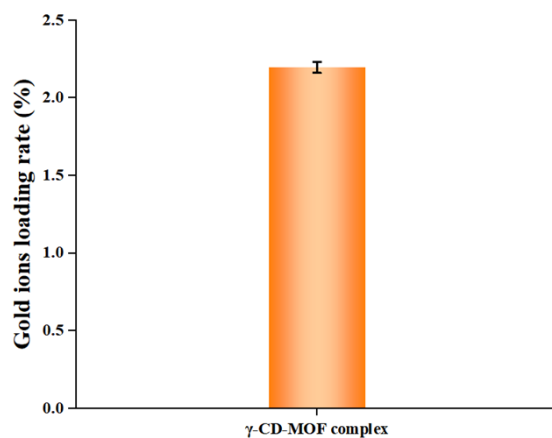

Fig. S2. Gold ions loading rate of  $\gamma$ -CD-MOF complex.

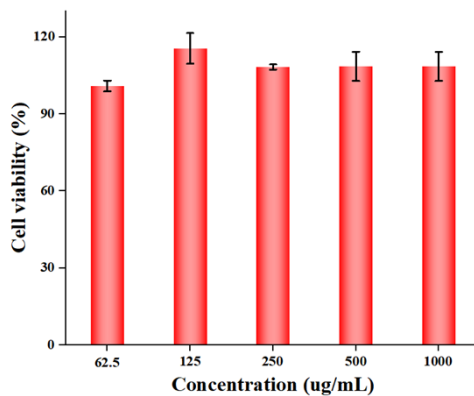

Fig. S3. In vitro cell viability of Caco-2 cells against  $\gamma$ -CD-MOF complex.

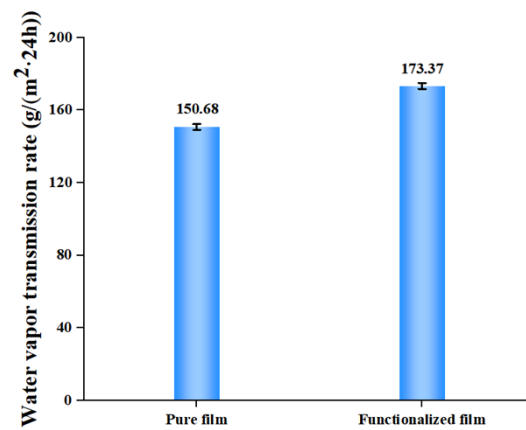

Fig. S4. Water vapor transmittance rate of pure film and functionalized film.

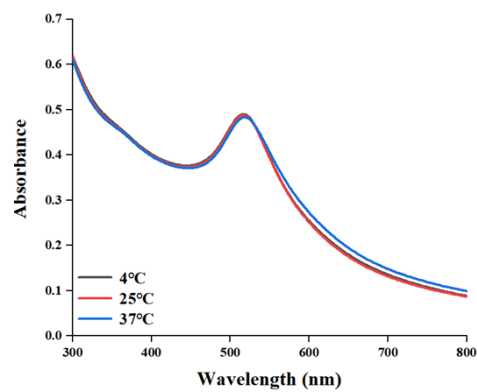

Fig. S5. UV-Vis absorbance spectra of  $\gamma$ -CD-MOF complex storage at different temperatures for 7 days.
